# Supplementary material for: Experiences in Midwifery Practices in Online Education From the Student Perspective: A Phenomenological Study
Source: Research Square preprint supplement (doi:10.21203/rs.3.rs-8643072/v1), 2026-02-19
Supplement: Supplementary file 1 [file 0fb7c5ee91bbd005035628b5.docx]

**APPENDIX-1: Semi-Structured Interview FormYÖNERGE**

Hello

I am conducting a qualitative research study to identify the difficulties experienced by midwifery students in relation to practical applications during online education. I hope this research will shed light on the subject for students, faculty members, and other researchers.

For this research, I am interviewing first, third, and fourth-year midwifery students. All information provided in these interviews will be used solely for this research, and personal information will be kept completely confidential.

I estimate that the interview will last approximately 30-40 minutes. I would be very grateful if you could share your views and suggestions on how to solve the problems at the end of the interview. If you allow me, I would like to record the interview. This way, I can use the time more effectively and have a more detailed record of your answers to the questions.

Thank you for agreeing to participate in this research. If you have any questions you would like to ask me before the interview, please feel free to do so. If you have no further questions, I would like to begin the interview.

**Sociodemographic Information**

**Your age?...........**

**What grade are you in?.........**

**What is your family type?**

1. Nuclear family ( )

2. Extended family ( )

**How would you describe your income level?**

1. Good ( )

2. Medium ( )

3. Poor ( )

**Do you own your own phone or computer?**

1. Yes ( )

2. No ( )

**How is your internet access?**

1. Wi-Fi ( )

2. Phone ( )

3. Wi-Fi + Phone ( )

4. I have no access ( )

**Are you working while studying?**

1. I am not working ( )

2. I am working part-time ( )

3. I am working full-time ( )

**Semi-Structured Interview Form**

1. What does the online education system mean to you? Can you explain?

2. Did you experience any problems with the online education process? If so, can you describe these problems?

3. Did the online nature of the practical lessons make things difficult for you? If so, in what way did you experience the most difficulty?

4. How do you practice the basic midwifery skills taught to you during online education?

5. After taking your practical lessons online, what problems do you think you will encounter in the field? Why?

Final Question: Do you think you will be able to perform these practices on individuals when you go out into the field? Why?
